# Supplementary material for: Food Practices of Ancient South Indians: Insights from Biomolecular Analyses of Potteries
Source: Research Square preprint supplement (doi:10.21203/rs.3.rs-6604909/v1), 2025-05-12
Supplement: Supplementary file 1 [file 1a44fc83be3d59c3c67a2f29.xlsx]

## Sheet: Sheet1
		S.No	Identified Biomarkers	Archaeological Sites / Sample Codes				Molecular Mass	Monoisotopic Mass	PubChem CID	Lipid Maps ID
				Gottiprolu		Keeladi
			Plant Sterols	YA3	YC5Q2	XA7/3	A1/2
		1	Stigmasterol	Detected	Detected	N.D	N.D	412.692	412.3705	5280794	LMST01040123
		2	Beta-Sitosterol	Detected	Detected	Detected	Detected	414.708	414.386	222284	LMST01040129
			Polyphenols
		3	Resveratrol	Detected	N.D	N.D	N.D	228.244	228.079	445154	LMPK13090005
		4	Chlorogenic acid	Detected	N.D	N.D	N.D	354.309	354.095	1794427	NA
		5	(Epi)-Catechin	Detected	Detected	Detected	Detected	290.269	290.079	(72276)/9064	LMPK12020003/ LMPK12020001
		6	Procyanidin dimer A-Type	Detected	Detected	Detected	Detected	576.505	576.127	(124025)/ 5089889	NA
		7	Procyanidin dimer B-Type	Detected	Detected	Detected	Detected	578.521	578.142	11250133 /122738 / 146798 / 147299	LMPK12030001/2/3/4
		8	Procyanidin tetramer A-type (linear)	Detected	Detected	Detected	Detected	1153.26	1153.26	NA	NA
			Glycerolipids
		9	MG (18:0)	Detected	Detected	Detected	Detected	358.557	358.308	24699	LMGL01010003
		10	DG (12:0/18:0)	Detected	Detected	N.D	N.D	540.8595	540.4753	56936303	LMGL02010335
		11	TG (16:0/16:0/18:1)	Detected	Detected	N.D	N.D	833.36	832.752	25240460	LMGL03010006
		12	TG (16:0/16:0/18:0)	Detected	Detected	N.D	N.D	835.375	834.768	3246953	LMGL03010004
		13	TG (16:0/18:2/18:2)	Detected	Detected	N.D	N.D	855.365	854.736	25240363	LMGL03010141
		14	TG (16:0/18:1/18:2)	Detected	Detected	N.D	N.D	857.381	856.752	25240361	LMGL03010121
			Glycerophospholipids
		15	PA(P-16:0/18:0)	Detected	Detected	Detected	Detected	660.9464	660.5093	52929667	LMGP10030012
		16	PA(P-16:0/16:0)	Detected	Detected	N.D	N.D	632.893	632.478	52929662	LMGP10030007
		17	PA (12:0/12:0)	Detected	N.D	N.D	N.D	536.68	536.348	9547171	LMGP10010030
		18	Hexacosanoyl-CoA	Detected	Detected	N.D	N.D	1146.21	1145.5	25246198	LMFA07050327
		19	M(IP)2C(t18:0/16:0)	Detected	Detected	N.D	N.D	1202.3	1201.61	70699178	LMSP03030108
		20	M(IP)2C(t18:0/18:0)	Detected	N.D	N.D	N.D	1230.35	1229.65	70699179	LMSP03030109
