# Supplementary material for: Food Practices of Ancient South Indians: Insights from Biomolecular Analyses of Potteries
Source: Research Square preprint supplement (doi:10.21203/rs.3.rs-6604909/v1), 2025-05-12
Supplement: Supplementary file 2 [file 45c97149f1dd46c93440e877.docx]

Description for the supplementary video file

The video is made by combining around a thousand 2D slices of the XA7-3 pottery shred. It illustrates the pottery's internal pore structure. The evolution of the internal pore structure of the pottery shards can be visualized non-destructively.
