# Supplementary material for: Food Practices of Ancient South Indians: Insights from Biomolecular Analyses of Potteries
Source: Research Square preprint supplement (doi:10.21203/rs.3.rs-6604909/v1), 2025-05-12
Supplement: Supplementary file 3 [file 6f23df3b22e1f186b20ebfea.docx]

**Materials and Methods**

**Preparation of Total Lipid Extracts:**

The surface of the pottery shreds was wiped with methanol (HPLC grade, Qualigens, cat. no. Q43637G) to remove exogenous contaminants. Approximately 2 g of the pottery shreds were finely ground in a mortar and transferred to a 10 ml glass extraction tube (I) containing 5 ml of organic extraction solvent CHCl3 (Qualigens, cat. no. Q43316) in MeOH (2:1 vol/vol). The mixture was then ultrasonicated in a water bath at room temperature for 30 minutes. Next, the mixture was transferred to a clean Eppendorf vial and centrifuged at 12,000 rpm for 10 minutes at room temperature. The upper layer (supernatant) of the centrifuged mixture contains all the organic residues, which are transferred to a fresh glass tube (II) for further analysis. The leftover solid component was discarded. Following this, 2 mL of the organic extraction solvent was added directly to extraction tube (I) and centrifuged for another 10 minutes at the same rpm as mentioned above to recover the remaining organic residues adhering to the walls of extraction tube (I). The solvents in glass tube (II) were removed by slow evaporation. The dried enriched organic residues appeared as oily droplets and are referred to as total lipid extract (TLE), stored at 5 °C in a refrigerator for analysis.

**UPLC–Tandem mass spectrometry:**

To understand the nature of the chemical species present in the TLE, the sample was resuspended in 0.5 mL of LC-MS grade methanol (Fisher Scientific) and injected into a UPLC-Q-ToF-MS/MS (Waters Xevo G2-XS Q-ToF mass spectrometer). At the beginning and end of each batch, a black was injected to evaluate for carryover. For UPLC, a Waters ACQUITY UPLC H-Class System (Waters Corp., Milford, MA 01757, USA) with a binary solvent delivery system and an autosampler was utilized to conduct the UPLC analysis. A Waters ACQUITY UPLCr BEH C18 Column, 130Å, 2.1mm X 50mm, 1.7µm, served for the chromatography. Two eluents were used as the mobile phase; Mobile phase A is 0.1% FA (vol/vol) in ultrapure water, and Mobile phase B is 0.1% FA (vol/vol) in acetonitrile. The UPLC elution conditions were optimized as follows: a linear gradient from 50% to 80% B in 5 minutes, from 80% to 95% B in 10–36 minutes, and from 95% to 50% B in 36.10–38 minutes. A flow rate of 0.300 mL/min was maintained. A Waters Xevo G2-XS Q-ToF (Waters MS Technologies, Manchester, UK) equipped with a unispray ionization source was deployed for the positive ion mode of the MS analysis. Leucine-enkephalin was utilized as the lock mass to generate a [M+H]+ ion (m/z 556.2771) at a concentration of 200 pg/mL and an infusion flow rate of 10 mL/min using the Lock Spray mode. The autosampler was maintained at 10°C, while the column was kept at 40°C. The desolvation gas flow was set to 1000 L/h at 500°C. The source temperature was established at 150°C, and the cone gas flow rate was configured to 50 L/h. The cone and capillary voltages were set to 30.0 V and 3 kV (+ve), respectively. Data acquisition was performed using MassLynx v4.2 software (Waters).

For further identification of chemical species, MS/MS was performed using a collision cell filled with Argon. The selected species are isolated in the quadrupole (data-directed MS/MS)

With a fixed kinetic energy, the molecules fragment when they collide with the Ar gas. The mass of the fragmented molecules is analyzed. Elemental composition analysis was performed using the monoisotopic mass obtained from MS or MS/MS.

**Reference:**

1. Correa-Ascencio, M. & Evershed, R. P. High throughput screening of organic residues in archaeological potsherds using direct acidified methanol extraction. *Anal. Methods* **6**, 1330–1340 (2014).

2. Sacchi, R. *et al.* Olive oil from the 79 A.D. Vesuvius eruption stored at the Naples National Archaeological Museum (Italy). *npj Sci. Food* **4**, (2020).
